# Supplementary material
Source: ML conference proceedings conference paper supplement (https://openaccess.thecvf.com/content/CVPR2023/html/Chen_VoxelNeXt_Fully_Sparse_CVPR_2023_paper.html)
Supplement: Supplementary file 1 [file Chen_VoxelNeXt_Fully_Sparse_CVPR_2023_supplemental.pdf]

## Appendix

In this appendix, we first introduce implementation details in Sec. A. We then include additional experimental results in Sec. B. We also provide more visualizations and discussions in Sec. C and Sec. D.

### A. Implementation Details

**nuScenes** The nuScenes dataset [1] has 1,000 drive sequences, split into 700, 150, and 150 sequences for training, validation, and testing. nuScenes is collected by a 32-beam synced LIDAR and 6 cameras. The annotations include 10 classes. In the ablation study, detection models are trained on 1/4 training data and evaluated on the full validation set.

**Waymo** Waymo [11] is a large-scale public autonomous driving dataset, which contains 1,150 sequences in total, with 798 for training, and 202 for validation. It was collected by one long-range LiDAR sensor at 75 meters and four near-range sensors.

**Argoverse2** Argoverse2 [13] has 1000 sequences, including 700 for training, 150 for validation. The perception range is 200 radius meters, covering area of  $400\text{m} \times 400\text{m}$ . We follow FSD [3] for data processing.

**Voxelization** For nuScenes [1] dataset, point clouds are clipped in  $[-54\text{m}, 54\text{m}]$  for  $X$  or  $Y$  axis, and  $[-5\text{m}, 3\text{m}]$  for  $Z$  axis. Voxel size is  $(0.075\text{m}, 0.075\text{m}, 0.2\text{m})$  by default. For VoxelNeXt-2D, the voxel size along  $Z$  axis is  $8\text{m}$ .

For Waymo [11] dataset, point clouds are clipped into  $[-75.2\text{m}, 75.2\text{m}]$   $X$  or  $Y$  axis, and  $[-2\text{m}, 4\text{m}]$  for  $Z$  axis. Voxel size is  $(0.1\text{m}, 0.1\text{m}, 0.15\text{m})$  by default. For VoxelNeXt-2D, the voxel size along  $Z$  axis is  $6\text{m}$ .

#### Data Augmentations

For nuScenes dataset, random flipping, global scaling, global rotation, GT sampling [14], and translation augmentations are used. Flipping is randomly conducted along  $X$  and  $Y$  axes. Rotation angle is randomly picked between  $-45^\circ$  and  $45^\circ$ . Global scaling is conducted by a factor sampled between 0.9 and 1.1. The translation noise factors are sampled between 0 and 0.5. Only for test submission models, GT sampling is removed in the last 5 training epochs [12].

For Waymo dataset, data augmentations also include random flipping, global scaling, global rotation, and ground-truth (GT) sampling [14]. These settings are similar to those of nuScenes dataset and follow baseline methods [9, 16].

For Argoverse2 dataset, we use similar data augmentation to nuScenes and Waymo, except that we do not use ground-truth sampling.

#### Training Hyper-parameters

For nuScenes dataset, models are trained for 20 epochs with batch size 16. They are optimized with Adam [7]. Learning rate is initially  $1\text{e-}3$  and decays to  $1\text{e-}4$  in a co-

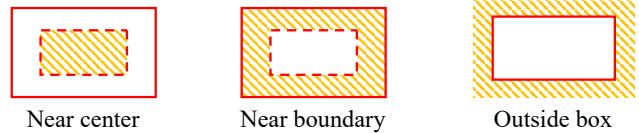

Figure A - 1. The relative positions of query voxel to the predicted boxes, e.g., *near center*, *near boundary*, *outside box*, corresponding to Tab. 7 in the paper.

sine annealing. Weight decay is 0.01. Gradients are clipped by norm 35. These settings follow CenterPoint [16].

For Waymo dataset, models are trained for 12 epochs by default. Batch size is set as 16. Learning rate is initialized as  $3\text{e-}3$ . They are also optimized with Adam [7].

For Argoverse2 dataset, we use similar settings to Waymo, except that only 6 epochs for training is enough.

#### Network Structures

We develop our VoxelNeXt network upon the widely-used residual sparse convolutional block [2, 9, 16]. We use 2D sparse convolutions in its variant of VoxelNeXt-2D. For voxel selection and box regression, we both use kernel-size-3 submanifold sparse convolutions [5] for prediction. The former convolution has 128 channels in VoxelNeXt-2D and 64 in 3D networks. Training schedules and hyper-parameters follow prior works [9, 16].

The backbone network of VoxelNeXt has 6 stages. The channels for these stages are  $\{16, 32, 64, 128, 128, 128\}$ . There are 2 residual submanifold sparse convolutional blocks [5] in each stage. The sparse head predicts outputs by  $3 \times 3$  submainfold sparse convolutions. Following CenterPoint [16], the prediction layers are only shared among similar classes on nuScenes and shared among all classes on Waymo.

### B. Experimental results

**Performance on nuScenes Validation** We provide the performance of VoxelNeXt on nuScenes *val* in Tab. A - 1.

**Gaps between VoxelNeXt and VoxelNeXt-2D** We analyze the gaps between VoxelNeXt and VoxelNeXt-2D on different amounts of training data in Tab. A - 3. These models are trained on 1/4, 1/2, and full nuScenes training set, respectively, and evaluated on the full validation set. It shows that The gap is large on the 1/4 training data, while the gaps gradually narrow as the data amount grows. Overall, the 3D network can obtain much better performance than its 2D counterpart at a small amount of data. Meanwhile, VoxelNeXt-2D has the potential on a large data amount.

**Resolution of Sparse Head** We make an ablation study on the resolution of prediction head in Tab. A - 2. The performance decreases as the head resolution increases from

Table A - 1. Comparison on the nuScenes validation split. This table presents detailed performance for Tab. 1 in the paper.

| Method           | Latency | mAP  | NDS  | Car  | Truck | Bus  | Trailer | C.V. | Ped  | Mot  | Byc  | T.C. | Bar  |
|------------------|---------|------|------|------|-------|------|---------|------|------|------|------|------|------|
| SECOND [14]      | 64 ms   | 50.6 | 62.3 | 81.8 | 51.7  | 66.9 | 37.3    | 15.0 | 77.7 | 42.5 | 17.5 | 57.4 | 59.2 |
| CenterPoint [16] | 96 ms   | 58.6 | 66.2 | 85.0 | 58.2  | 69.5 | 35.7    | 15.5 | 85.3 | 58.8 | 40.9 | 70.0 | 67.1 |
| VoxelNeXt        | 66 ms   | 60.0 | 67.1 | 85.6 | 58.4  | 71.6 | 38.6    | 17.9 | 85.4 | 59.7 | 43.4 | 70.8 | 68.1 |

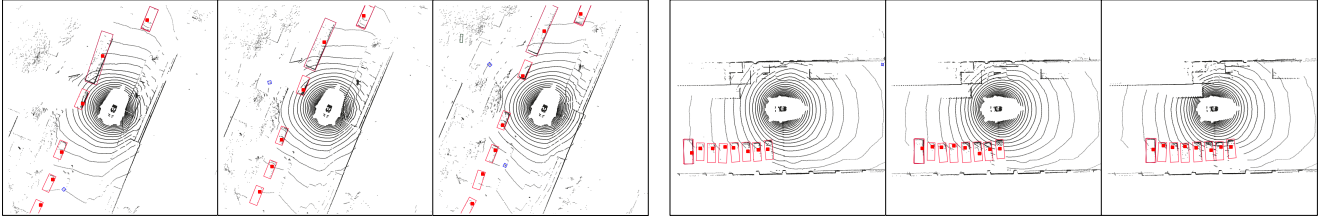

Figure A - 2. Detections of adjacent frames. We visualize predicted boxes and the corresponding query voxels, which are enlarged as red squares. This figure is best viewed by zoom-in.

Table A - 2. Effects of the feature levels for prediction.  $D^{3-5}$  and  $D^{1-5}$  contains multiple heads on various feature levels.

| Method    | Head resolution   | mAP         | NDS         |
|-----------|-------------------|-------------|-------------|
| $D^3$     | 8                 | <b>56.2</b> | <b>64.3</b> |
| $D^4$     | 16                | 52.5        | 60.7        |
| $D^5$     | 32                | 49.0        | 57.9        |
| $D^{3-5}$ | {8, 16, 32}       | 55.7        | 63.7        |
| $D^{1-5}$ | {2, 4, 8, 16, 32} | 53.9        | 62.2        |

Table A - 3. Gap between VoxelNeXt-2D and VoxelNet. mAP on nuScenes validation with different amounts of training data.

| Method       | 1/4  | 1/2  | full |
|--------------|------|------|------|
| VoxelNeXt-2D | 53.4 | 56.0 | 58.7 |
| VoxelNeXt    | 56.2 | 58.2 | 60.0 |

Table A - 4. Results on Vehicle detection on Waymo. \* means decreasing the number of pasted instances in the ground-truth sampling augmentation and increase training epochs by 6 epochs [3].

| Method     | L1 AP/APH   | L2 AP/APH   |
|------------|-------------|-------------|
| VoxelNeXt  | 78.2 / 77.7 | 69.9 / 69.4 |
| VoxelNeXt* | 79.1 / 79.0 | 70.8 / 70.5 |

the default setting of 8 to 32. In addition, we also evaluate the multi-head design of {8, 16, 32} and {2, 4, 8, 16, 32}, where results are combined from the multiple heads with various resolutions. These multi-head models present no better results than the single-resolution 8 network.

**Performance on Waymo vehicle detection** In Tab. A - 4, we follow FSD [3] to decrease the number of pasted instances in the ground-truth sampling augmentation and increase training epochs by 6 epochs. This trick leads to better results upon VoxelNeXt on the Waymo object detection.

### C. Visualizations

We visualize the detections of adjacent frames in Fig. A - 2. The corresponding query voxels are depicted as red squares. We also provide a sequence of video frames, in both BEV and perspective views.

### D. Discussions

**Point-based Detectors** Point-based 3D object detectors [8, 10, 15, 17] are fully sparse by their very nature. Point R-CNN [10] is a pioneer work and presents decent performance on KITTI [4]. Methods of SSD series [6, 15, 18, 19], including 3DSSD [15], inherit the point-based tradition and accelerate the methods with simplified pipelines. VoteNet [8] is based on center voting and studies indoor 3D object detection. However, point-based detectors are usually used in scenes with limited points. The neighborhood query operation is still unaffordable in large-scale benchmarks [1, 11], which are dominated by voxel-based detectors [9, 16].

**Boarder Impacts** VoxelNeXt replies on 3D data and its spatially sparse distribution. It might reflect biases in data collection, including the ones of negative societal impacts.

### References

- [1] Holger Caesar, Varun Bankiti, Alex H. Lang, Sourabh Vora, Venice Erin Liong, Qiang Xu, Anush Krishnan, Yu Pan,

- Giancarlo Baldan, and Oscar Beijbom. nuscenes: A multimodal dataset for autonomous driving. In *CVPR*, pages 11618–11628, 2020. 1, 2
- [2] Jiajun Deng, Shaoshuai Shi, Peiwei Li, Wengang Zhou, Yanyong Zhang, and Houqiang Li. Voxel R-CNN: towards high performance voxel-based 3d object detection. In *AAAI*, pages 1201–1209, 2021. 1
- [3] Lue Fan, Feng Wang, Naiyan Wang, and Zhaoxiang Zhang. Fully sparse 3d object detection. *CoRR*, abs/2207.10035, 2022. 1, 2
- [4] Andreas Geiger, Philip Lenz, Christoph Stiller, and Raquel Urtasun. Vision meets robotics: The KITTI dataset. *Int. J. Robotics Res.*, 32(11):1231–1237, 2013. 2
- [5] Benjamin Graham, Martin Engelcke, and Laurens van der Maaten. 3d semantic segmentation with submanifold sparse convolutional networks. In *CVPR*, pages 9224–9232, 2018. 1
- [6] Chenhong He, Hui Zeng, Jianqiang Huang, Xian-Sheng Hua, and Lei Zhang. Structure aware single-stage 3d object detection from point cloud. In *CVPR*, pages 11870–11879, 2020. 2
- [7] Diederik P. Kingma and Jimmy Ba. Adam: A method for stochastic optimization. In Yoshua Bengio and Yann LeCun, editors, *ICLR*, 2015. 1
- [8] Charles R. Qi, Or Litany, Kaiming He, and Leonidas J. Guibas. Deep hough voting for 3d object detection in point clouds. In *ICCV*, pages 9276–9285, 2019. 2
- [9] Shaoshuai Shi, Chaoxu Guo, Li Jiang, Zhe Wang, Jianping Shi, Xiaogang Wang, and Hongsheng Li. PV-RCNN: point-voxel feature set abstraction for 3d object detection. In *CVPR*, pages 10526–10535, 2020. 1, 2
- [10] Shaoshuai Shi, Xiaogang Wang, and Hongsheng Li. Pointcnn: 3d object proposal generation and detection from point cloud. In *CVPR*, pages 770–779, 2019. 2
- [11] Pei Sun and et. al. Scalability in perception for autonomous driving: Waymo open dataset. In *CVPR*, pages 2443–2451, 2020. 1, 2
- [12] Chunwei Wang, Chao Ma, Ming Zhu, and Xiaokang Yang. Pointaugmenting: Cross-modal augmentation for 3d object detection. In *CVPR*, pages 11794–11803, 2021. 1
- [13] Benjamin Wilson and et. al. Argoverse 2: Next generation datasets for self-driving perception and forecasting. In *NeurIPS*, 2021. 1
- [14] Yan Yan, Yuxing Mao, and Bo Li. SECOND: sparsely embedded convolutional detection. *Sensors*, 18(10):3337, 2018. 1, 2
- [15] Zetong Yang, Yanan Sun, Shu Liu, and Jiaya Jia. 3dssd: Point-based 3d single stage object detector. In *CVPR*, pages 11037–11045, 2020. 2
- [16] Tianwei Yin, Xingyi Zhou, and Philipp Krähenbühl. Center-based 3d object detection and tracking. In *CVPR*, pages 11784–11793, 2021. 1, 2
- [17] Yifan Zhang, Qingyong Hu, Guoquan Xu, Yanxin Ma, Jianwei Wan, and Yulan Guo. Not all points are equal: Learning highly efficient point-based detectors for 3d lidar point clouds. In *CVPR*, pages 18931–18940, 2022. 2
- [18] Wu Zheng, Weiliang Tang, Sijin Chen, Li Jiang, and Chi-Wing Fu. CIA-SSD: confident iou-aware single-stage object detector from point cloud. In *AAAI*, pages 3555–3562, 2021. 2
- [19] Wu Zheng, Weiliang Tang, Li Jiang, and Chi-Wing Fu. SE-SSD: self-ensembling single-stage object detector from point cloud. In *CVPR*, pages 14494–14503, 2021. 2
